# Supplementary material for: Identification of Active and Spectator Sn Sites in Sn-β Following Solid-State Stannation, and Consequences for Lewis Acid Catalysis
Source: PubMed Central journal article supplement (PMC4641460; doi:10.1002/cctc.201500545), 2015-09-01
Supplement: cctc0007-3322-sd1.pdf [file cctc0007-3322-sd1.pdf]

Heterogeneous & Homogeneous & Bio- & Nano-

# CHEM **CAT** CHEM

---

CATALYSIS

## Supporting Information

### Identification of Active and Spectator Sn Sites in Sn- $\beta$ Following Solid-State Stannation, and Consequences for Lewis Acid Catalysis

Ceri Hammond,<sup>\*[a]</sup> Daniele Padovan,<sup>[a]</sup> Abbas Al-Nayili,<sup>[a]</sup> Peter. P. Wells,<sup>[b, c]</sup>  
Emma K. Gibson,<sup>[b, c]</sup> and Nikolaos Dimitratos<sup>[a]</sup>

cctc\_201500545\_sm\_miscellaneous\_information.pdf

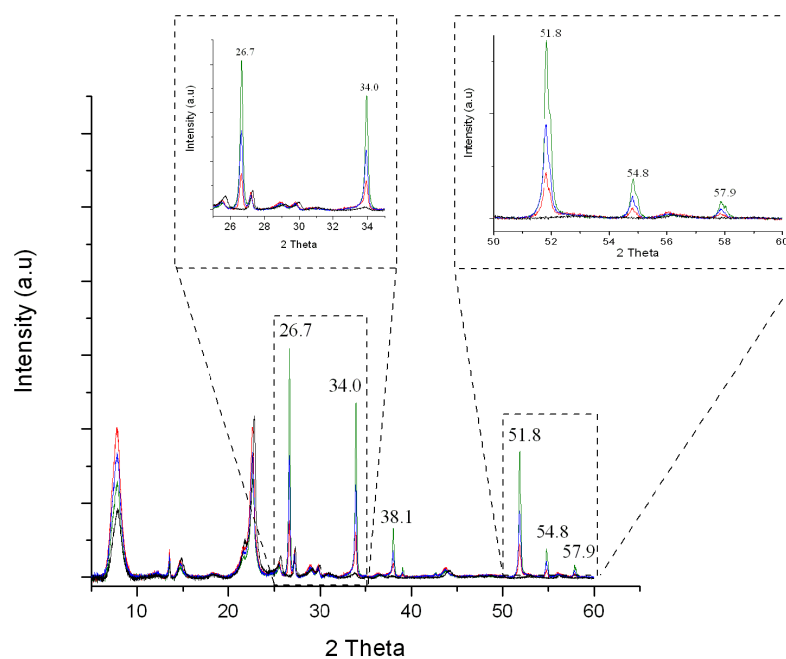

Figure S1(A). pXRD patterns of various Sn(O<sub>2</sub>)-β catalysts prepared by physical mixing of SnO<sub>2</sub> and deAl-β, and containing different Sn contents. Black: deAl-beta; Red; 2Sn(O<sub>2</sub>)-β; Blue: 5Sn(O<sub>2</sub>)-β and Green: 10Sn(O<sub>2</sub>)-β. The reflections at 26.7° and 51.8° 2θ provide the best insight regarding the presence of any SnO<sub>2</sub>, although a broad reflection at 52.3° overlaps with the 51.8° reflection to some extent. As can be seen, the SnO<sub>2</sub> reflections are clearly discernible at a loading of 2 % SnO<sub>2</sub> (red diffraction pattern).

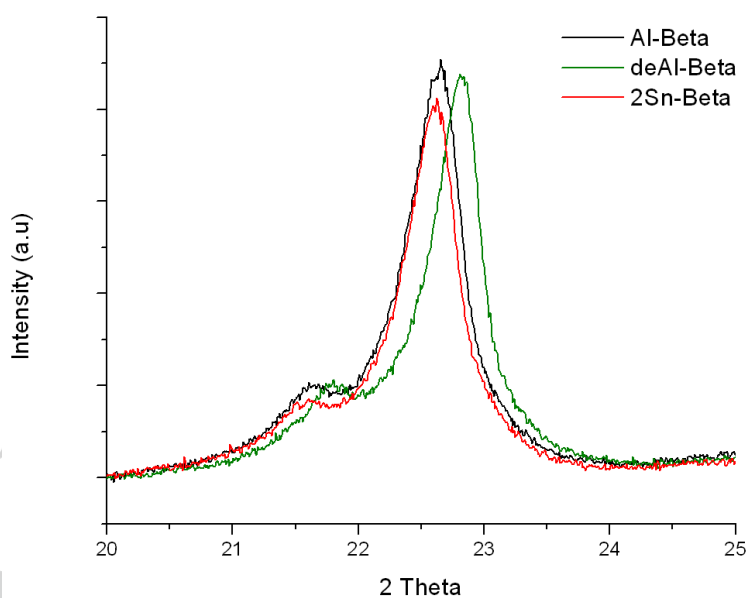

Figure S1(B). Expansion of the pXRD patterns between 20-25° 2 theta for: Black: Al-beta; Green: deAl-beta and Red; 2Sn-beta. Shifts in the 2 theta position indicate a change in d-spacing and hence, unit cell volume.

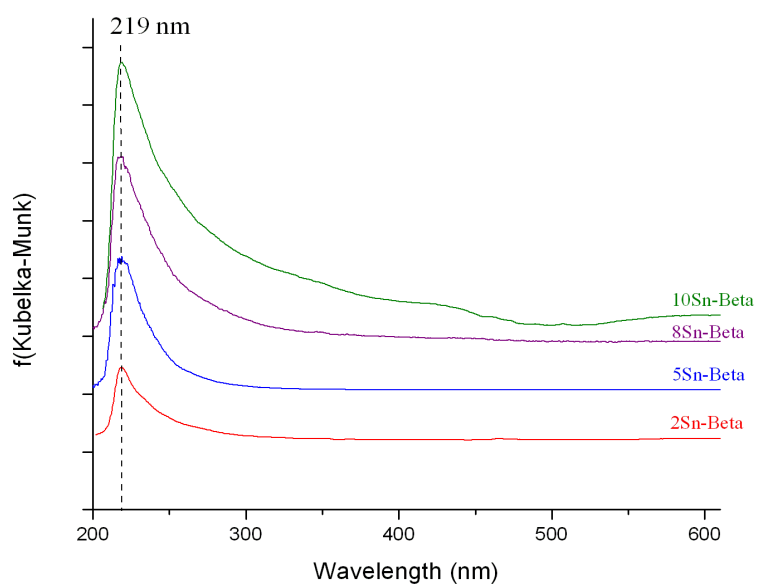

Figure S2. UV-Vis spectra of various Sn- $\beta$  catalysts prepared by SSI, and containing different Sn contents. Red: 2Sn- $\beta$ ; Blue: 5Sn- $\beta$ ; Purple: 8Sn- $\beta$  and Green: 10Sn- $\beta$

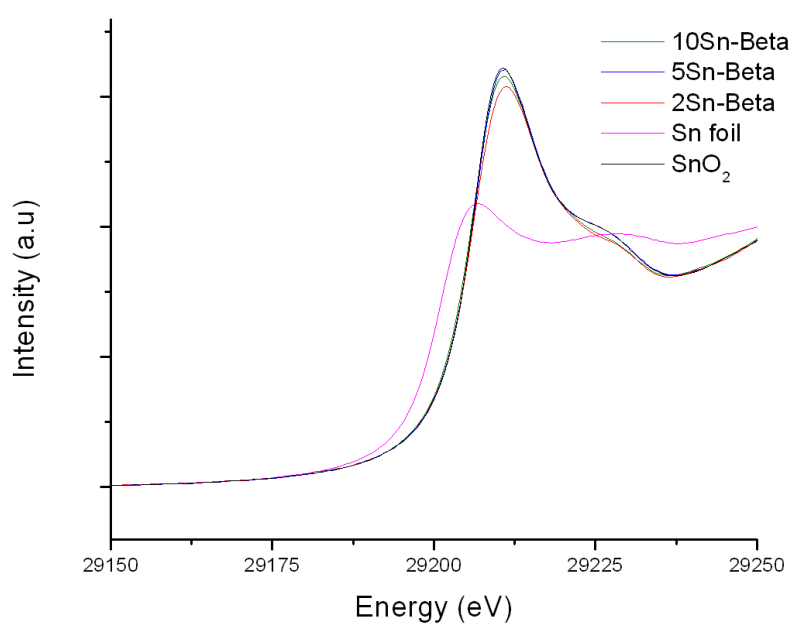

Figure S3. Normalised XANES spectra of 2Sn- $\beta$  (red), 5Sn- $\beta$  (blue), 10Sn- $\beta$  (green). Reference XANES spectra of SnO<sub>2</sub> and Sn foil are included for a comparison.

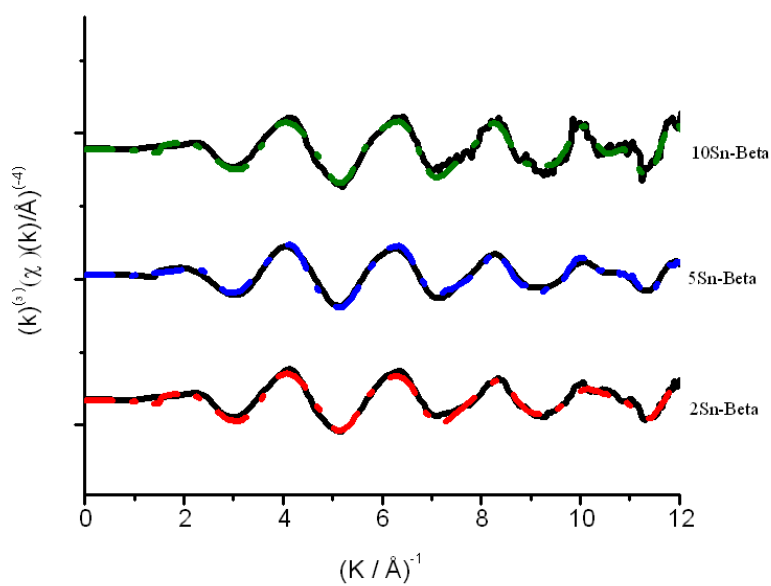

Figure S4.  $\chi$ -data of hydrated Sn- $\beta$  catalysts containing different Sn loadings; 2Sn- $\beta$  (red), 5Sn- $\beta$  (blue), 10Sn- $\beta$  (green).

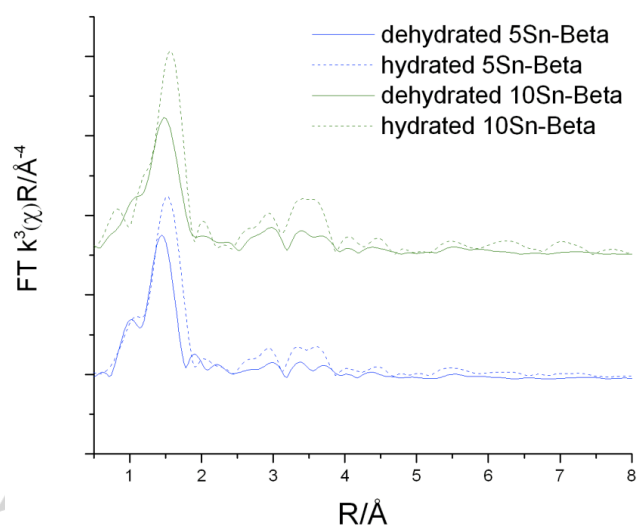

Figure S5. Comparison of the magnitude of the Fourier transform (FT) signal for dehydrated and hydrated Sn- $\beta$  catalyst containing different loadings. 5Sn- $\beta$  (blue), 10Sn- $\beta$  (green).

**Table S1. Porosymmetry data obtained for various zeolite beta materials.<sup>a</sup>**

| Sample      | $S_{\text{BET}}$<br>( $\text{m}^2 \text{g}^{-1}$ ) <sup>a</sup> | $S_{\text{external}}$<br>( $\text{m}^2 \text{g}^{-1}$ ) <sup>b</sup> | $S_{\text{micro}}$<br>( $\text{m}^2 \text{g}^{-1}$ ) <sup>c</sup> | $V_{\text{total}}$<br>( $\text{cm}^3 \text{g}^{-1}$ ) <sup>d</sup> | $V_{\text{micro}}$<br>( $\text{cm}^3 \text{g}^{-1}$ ) <sup>e</sup> | $V_{\text{external}}$<br>( $\text{cm}^3 \text{g}^{-1}$ ) <sup>f</sup> |
|-------------|-----------------------------------------------------------------|----------------------------------------------------------------------|-------------------------------------------------------------------|--------------------------------------------------------------------|--------------------------------------------------------------------|-----------------------------------------------------------------------|
| Al-Beta     | 587                                                             | 91                                                                   | 496                                                               | 0.451                                                              | 0.230                                                              | 0.221                                                                 |
| de-Al-Beta  | 541                                                             | 124                                                                  | 417                                                               | 0.453                                                              | 0.229                                                              | 0.224                                                                 |
| 2% Sn-Beta  | 528                                                             | 115                                                                  | 413                                                               | 0.421                                                              | 0.225                                                              | 0.196                                                                 |
| 5% Sn-Beta  | 488                                                             | 103                                                                  | 384                                                               | 0.418                                                              | 0.210                                                              | 0.208                                                                 |
| 8% Sn-Beta  | 440                                                             | 100                                                                  | 340                                                               | 0.390                                                              | 0.186                                                              | 0.204                                                                 |
| 10% Sn-Beta | 422                                                             | 94                                                                   | 327                                                               | 0.359                                                              | 0.179                                                              | 0.181                                                                 |

<sup>a</sup> BET surface area ( $S_{\text{BET}}$ ) is calculated from the Brunauer-Emmett-Teller method; <sup>b,c,e</sup> the external surface area ( $S_{\text{external}}$ ), micropore surface area ( $S_{\text{micro}}$ ) and the micropore volume ( $V_{\text{micro}}$ ) are calculated from the t-plot method; <sup>d</sup> the total pore volume ( $V_{\text{total}}$ ) is evaluated at  $P/P_0=0.99$ ; <sup>f</sup> the external pore volume ( $V_{\text{external}}$ ) is calculated according to  $V_{\text{total}} - V_{\text{micro}}$ .
